# Supplementary material for: FBXL4 ubiquitin ligase deficiency promotes mitophagy by elevating NIX levels
Source: PubMed Central journal article supplement (PMC10308357; doi:10.15252/embj.2022112799), 2023-04-27
Supplement: EMBJ-42-e112799-s005.pdf [file EMBJ-42-e112799-s005.pdf]

# Expanded View Figures

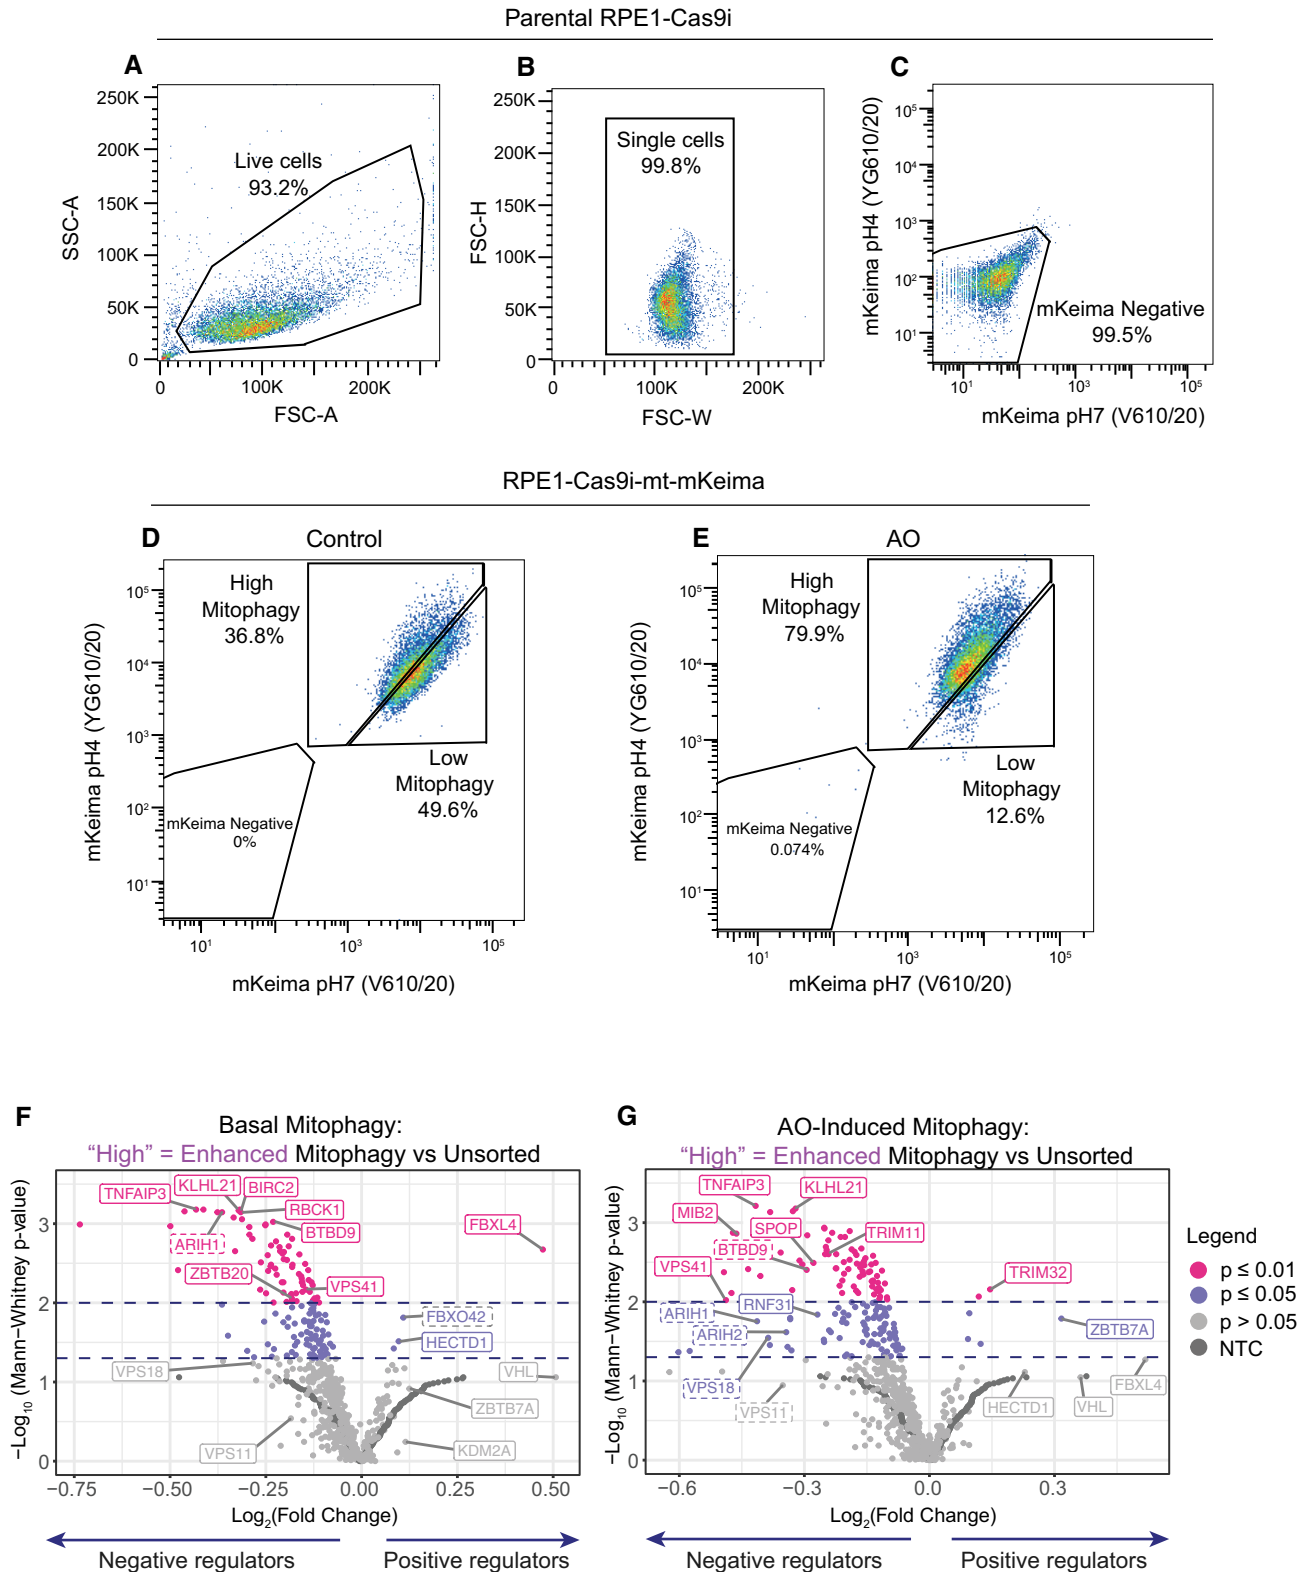

Figure EV1.

**Figure EV1. Characterization of RPE1-Cas9i cells stably expressing mt-mKeima.**

- A–C Parental RPE1-Cas9i cells were used to set the gates for flow cytometry for live (A) and single cells (B) and to exclude non-fluorescent cells (C).
- D, E RPE1-Cas9i-mt-mKeima cells were treated with DMSO (D) or antimycin A and oligomycin A (AO; 1 and 10  $\mu$ M, respectively) (E) for 24 h. An increase in the proportion of cells undergoing mitophagy (high mitophagy population) is observed in AO-treated cells.
- F, G Volcano plots showing the average  $\text{Log}_2$  fold change and  $-\text{Log}_{10}$   $P$ -value of genes in high mitophagy versus unsorted cells in the induced and basal mitophagy screen for two independent biological replicates. Statistical thresholds of 2 and 3 standard deviations from the mean are indicated by dashed lines and colour coding. Indicated are high-confidence (unbroken line) and lower-confidence (dashed line) candidates shown in Fig 1D–F.

**Figure EV2. Supplementary data for Figs 1–3.**

- A Quantitative RT–PCR reactions of FBXL4 (normalized to actin) were performed with cDNA derived from hTERT-RPE1 cells transfected with non-targeting (NT1) or siRNA-targeting FBXL4. Two primer pairs were used and are indicated by symbol shape. Shown is the fold change normalized to NT1 control samples for three independent colour-coded experiments. Error bars show standard deviation; unpaired  $t$ -test, \*\*\*\* $P$  < 0.0001.
- B Quantitative RT–PCR reactions of BNIP3 or NIX (normalized to actin) were performed with cDNA derived from hTERT-RPE1 cells transfected with non-targeting (NT1) or siRNA-targeting FBXL4 or HIF1 $\alpha$  (HIF). Two primer pairs were used per target indicated by different symbol shapes. Shown is the fold change normalized to the NT1 control samples for three independent colour-coded experiments. Error bars show standard deviation; one-way ANOVA and Dunnett's multiple-comparison test, \*\* $P$  < 0.01, \*\*\* $P$  < 0.001 and \*\*\*\* $P$  < 0.0001.
- C Sequencing analysis of FBXL4-knockout RPE1-Cas9i-mt-mkeima cell pools KO1 and KO2 using Synthego ICE analysis. Shown are the predicted edit and KO efficiency for each pool.
- D Western blot of lysates from matched control (Ctrl) and FBXL4 knockout RPE1-Cas9i-mt-mkeima cell pools probed for the mitochondrial protein TOMM40.
- E Quantification of data shown in D for four colour-coded independent experiments. Error bars show standard deviation. One-way ANOVA with Tukey's multiple-comparison test, \* $P$  < 0.05.
- F Western blot of lysates as in (D) probed for cathepsin D. Bands corresponding to mature and pro-cathepsin D (Pro) are indicated. A ponceau stain is shown to illustrate equal loading across the length of the lane. \*Indicates a non-specific band.

Source data are available online for this figure.

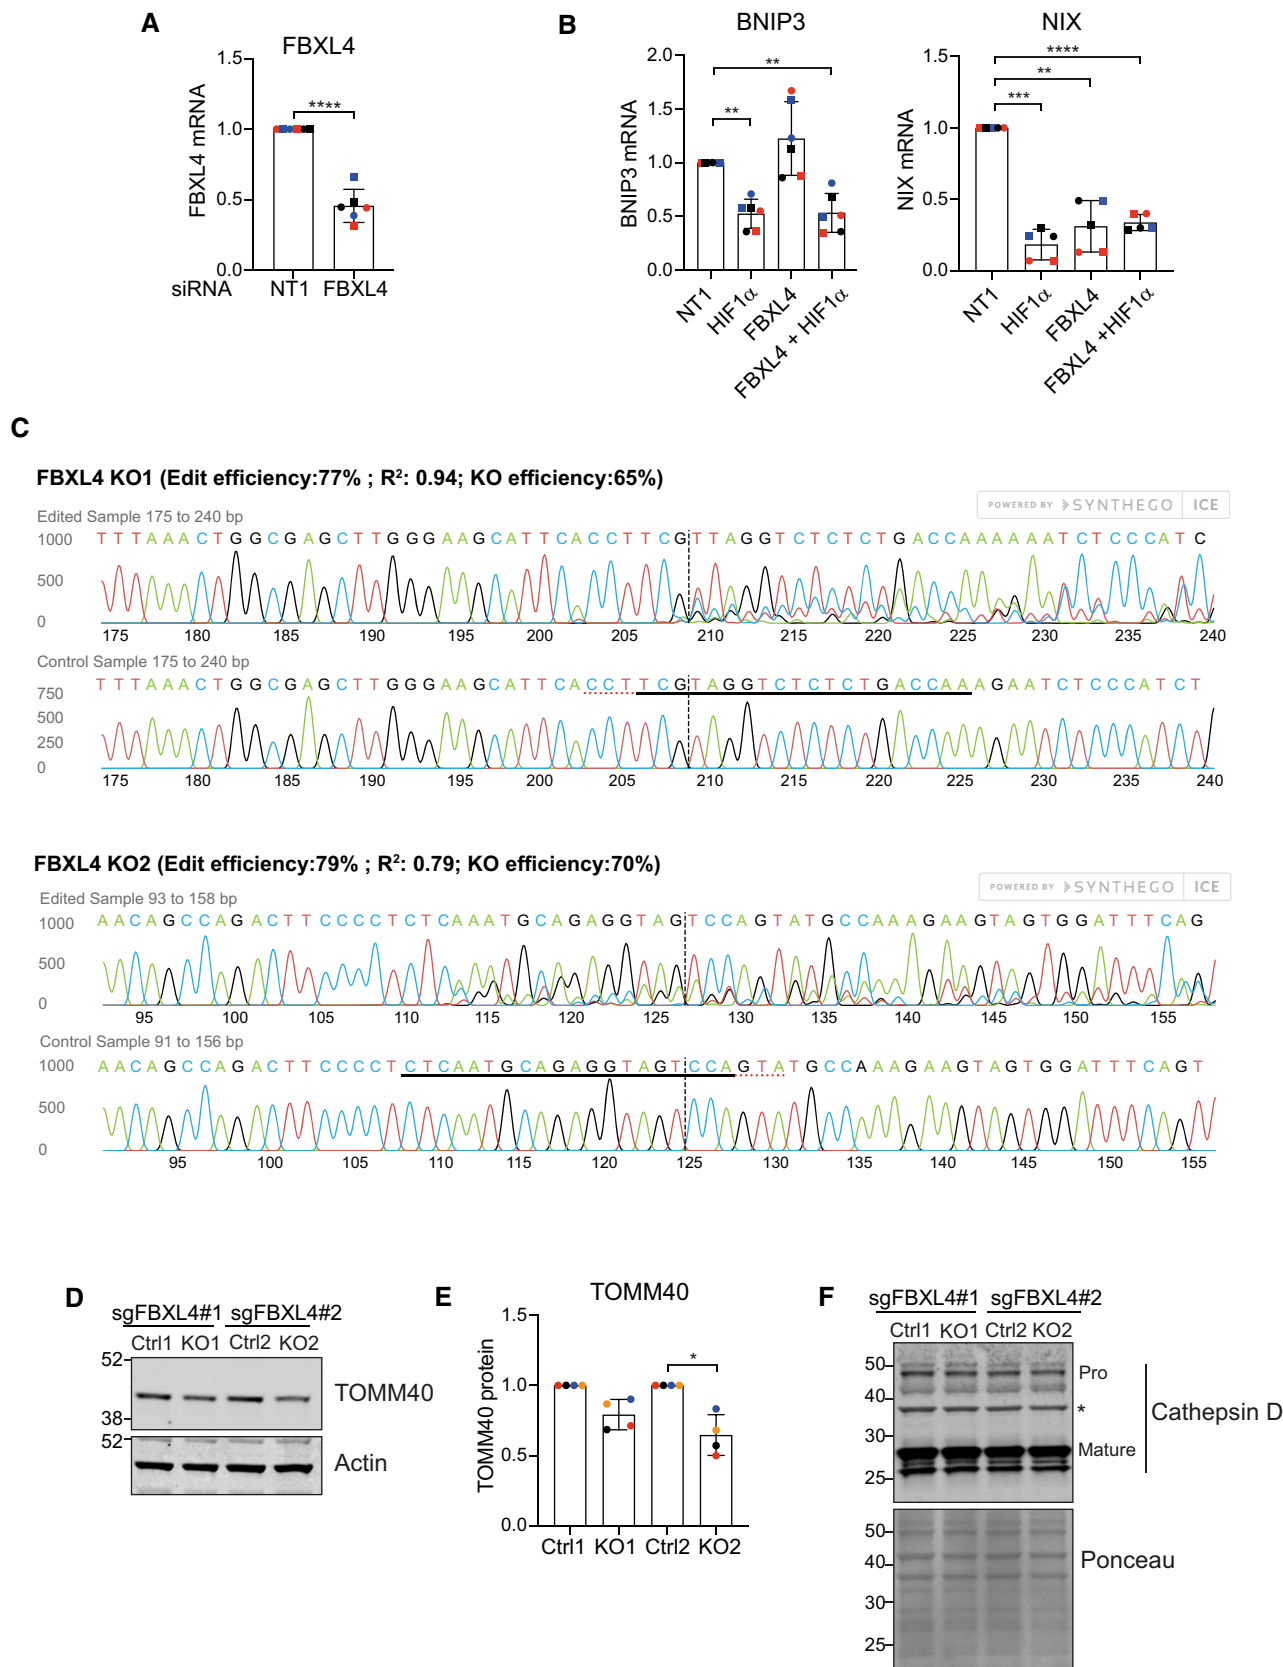

Figure EV2.

**Figure EV3. Accessory data indicating FBXL4 influences NIX and BNIP3 stability.**

- A Representative western blot of hTERT-RPE1 cells treated with DMSO, antimycin (1  $\mu$ M) and oligomycin (10  $\mu$ M) (AO) or MLN4924 (1  $\mu$ M) for 24 h.
- B Representative images of hTERT-RPE1 cells treated with DMSO or MLN4924 (1  $\mu$ M) for 24 h, fixed and stained for either BNIP3 or NIX and for TOMM20. Scale bar 20  $\mu$ m.
- C Quantitative RT-PCR reactions of BNIP3 or NIX (normalized to Actin) were performed with cDNA derived from hTERT-RPE1 cells treated with DMSO or MLN4924 (1  $\mu$ M) for 24 h. Two primer pairs were used per target indicated by different symbol shapes. Shown is the fold change normalized to the DMSO control sample for three independent colour-coded experiments. Error bars show standard deviation; unpaired *t*-test, \*\*\**P* < 0.001 and \*\*\*\**P* < 0.0001.
- D Representative western blot of hTERT-RPE1 cells pre-treated with DMSO or MLN4924 (1  $\mu$ M) for 6 h, followed by a cycloheximide chase (100  $\mu$ g/ml).
- E Representative western blot of lysates from control (Ctrl1) or FBXL4 KO1 RPE1-Cas9i-mt-mKeima cells pre-treated without or with MLN4924 (1  $\mu$ M) for 6 h followed by a cycloheximide (CHX) chase (100  $\mu$ g/ml).
- F, G Quantification of protein levels calculated from data represented in (E) for three independent colour-coded experiments. Error bars show standard deviation.
- H Representative western blot of hTERT-RPE1 cells transfected for 72 h with siRNA against indicated targets or non-targeting (NT1) prior to harvesting and cell lysis.
- Source data are available online for this figure.

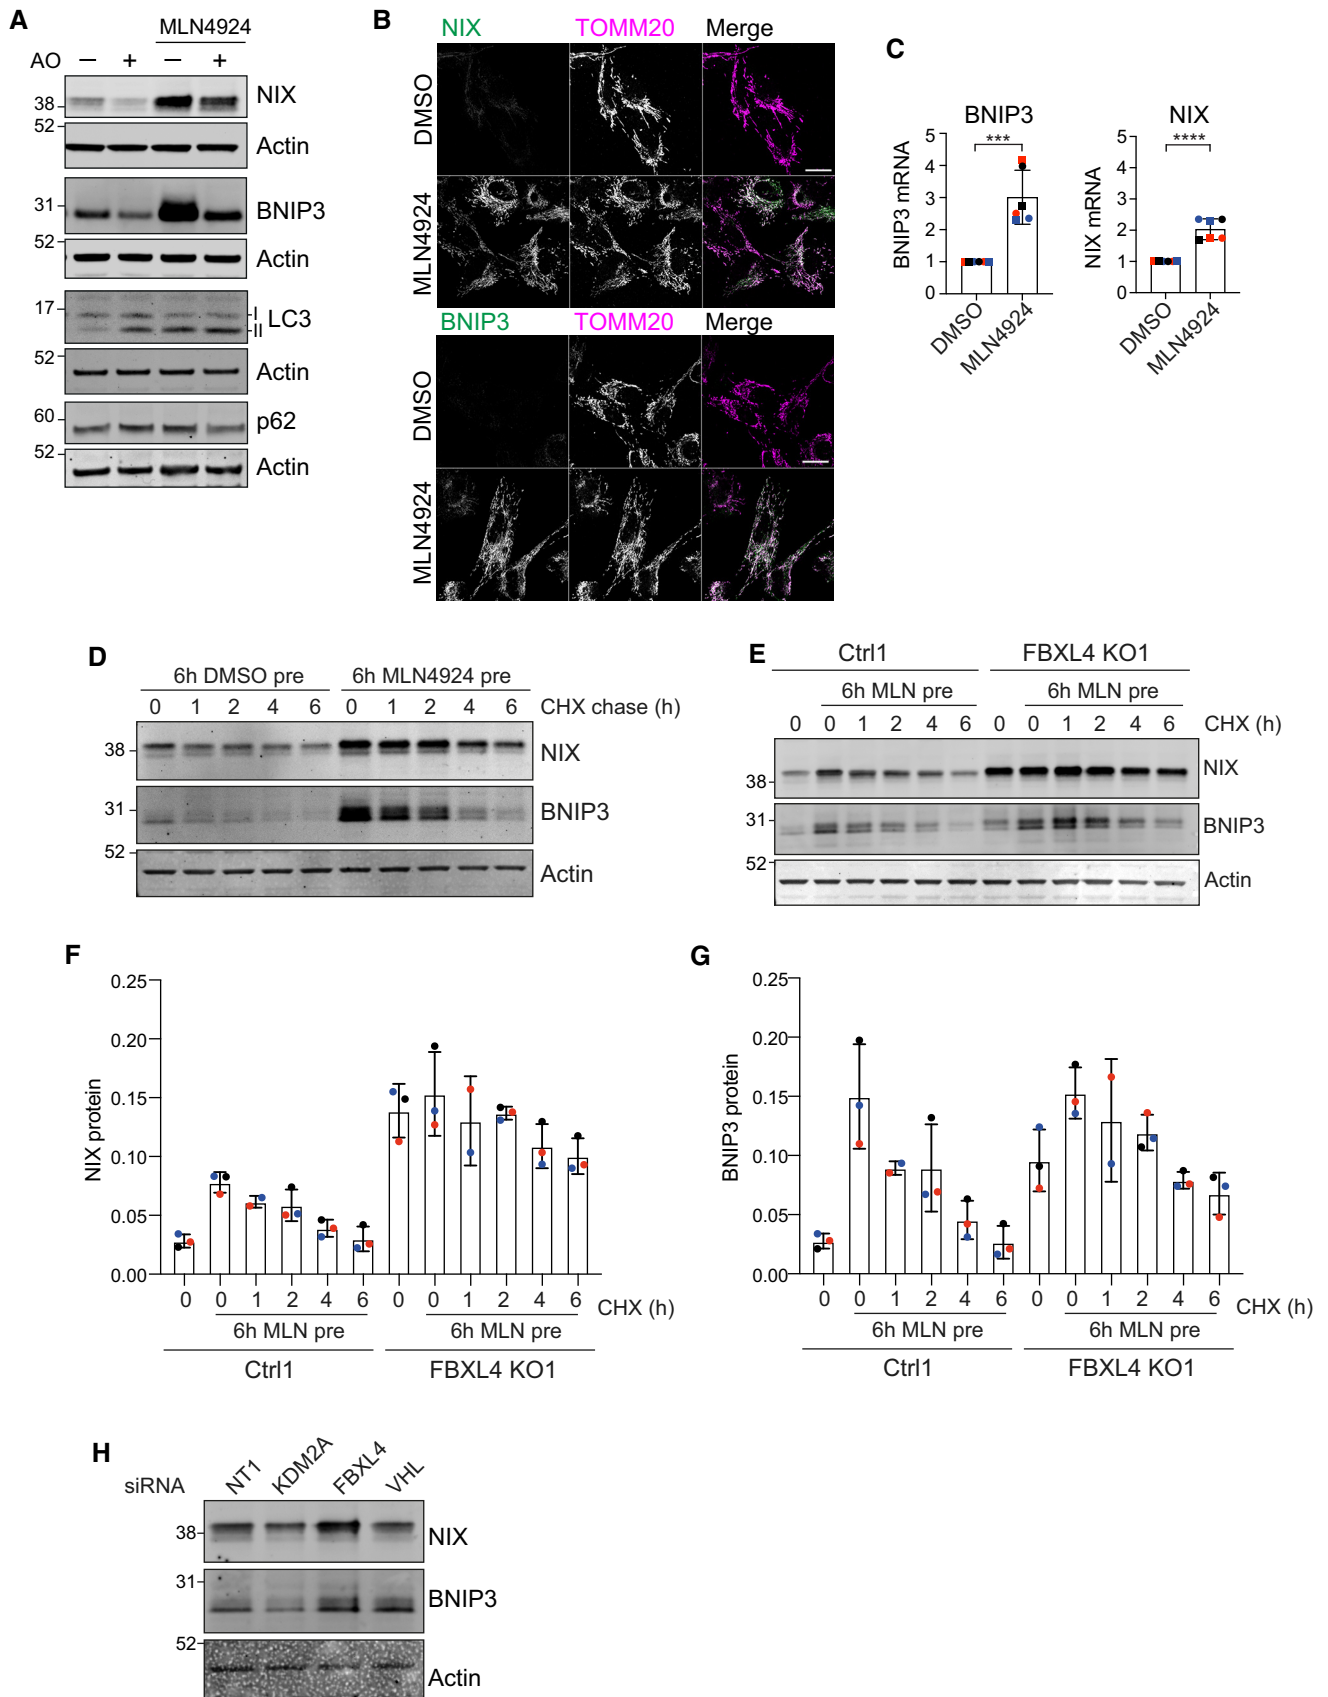

Figure EV3.
